# Supplementary material for: 『ヴェニスの商人』は、どう読まれるべきか
Source: MDPI journal article supplement (doi:10.3390/ijerph18094655), 1991-09-01
Supplement: s1 [file s1]

## Supplementary tables

| Prefecture | Cumulative cases* <sup>1</sup> | Cumulative deaths* <sup>1</sup> | Population* <sup>2</sup><br>(million) | Cases per million people | Deaths per million people |
|------------|--------------------------------|---------------------------------|---------------------------------------|--------------------------|---------------------------|
| Tokyo      | 85541                          | 725                             | 13.921                                | 6144.7                   | 52.1                      |
| Osaka      | 38160                          | 742                             | 8.809                                 | 4331.9                   | 84.2                      |
| Kanagawa   | 34209                          | 353                             | 9.198                                 | 3719.2                   | 38.4                      |
| Saitama    | 21599                          | 269                             | 7.35                                  | 2938.6                   | 36.6                      |
| Aichi      | 21312                          | 317                             | 7.552                                 | 2822.0                   | 42.0                      |
| Chiba      | 18383                          | 169                             | 6.259                                 | 2937.1                   | 27.0                      |
| Hokkaido   | 15969                          | 538                             | 5.25                                  | 3041.7                   | 102.5                     |
| Hyogo      | 13956                          | 306                             | 5.466                                 | 2553.2                   | 56.0                      |
| Fukuoka    | 13446                          | 136                             | 5.104                                 | 2634.4                   | 26.6                      |
| Kyoto      | 6916                           | 78                              | 2.583                                 | 2677.5                   | 30.2                      |
| Okinawa    | 6511                           | 86                              | 1.453                                 | 4481.1                   | 59.2                      |
| Hiroshima  | 4409                           | 70                              | 2.804                                 | 1572.4                   | 25.0                      |
| Shizuoka   | 3933                           | 63                              | 3.644                                 | 1079.3                   | 17.3                      |
| Ibaraki    | 3888                           | 44                              | 2.86                                  | 1359.4                   | 15.4                      |
| Gifu       | 3542                           | 55                              | 1.987                                 | 1782.6                   | 27.7                      |
| Gunma      | 3325                           | 60                              | 1.942                                 | 1712.2                   | 30.9                      |
| Tochigi    | 3213                           | 18                              | 1.934                                 | 1661.3                   | 9.3                       |
| Kumamoto   | 2987                           | 38                              | 1.748                                 | 1708.8                   | 21.7                      |
| Miyagi     | 2973                           | 20                              | 2.306                                 | 1289.2                   | 8.7                       |
| Nara       | 2567                           | 31                              | 1.33                                  | 1930.1                   | 23.3                      |
| Okayama    | 2102                           | 16                              | 1.89                                  | 1112.2                   | 8.5                       |
| Nagano     | 2016                           | 21                              | 2.049                                 | 983.9                    | 10.2                      |
| Mie        | 1800                           | 23                              | 1.781                                 | 1010.7                   | 12.9                      |
| Shiga      | 1766                           | 19                              | 1.414                                 | 1248.9                   | 13.4                      |
| Miyazaki   | 1567                           | 11                              | 1.073                                 | 1460.4                   | 10.3                      |
| Fukushima  | 1469                           | 33                              | 1.846                                 | 795.8                    | 17.9                      |
| Kagoshima  | 1386                           | 15                              | 1.602                                 | 865.2                    | 9.4                       |
| Ishikawa   | 1339                           | 54                              | 1.138                                 | 1176.6                   | 47.5                      |
| Nagasaki   | 1266                           | 14                              | 1.327                                 | 954.0                    | 10.6                      |
| Oita       | 933                            | 11                              | 1.135                                 | 822.0                    | 9.7                       |
| Wakayama   | 885                            | 11                              | 0.925                                 | 956.8                    | 11.9                      |
| Yamaguchi  | 856                            | 5                               | 1.358                                 | 630.3                    | 3.7                       |
| Yamanashi  | 854                            | 11                              | 0.811                                 | 1053.0                   | 13.6                      |
| Toyama     | 813                            | 27                              | 1.044                                 | 778.7                    | 25.9                      |
| Ehime      | 812                            | 14                              | 1.339                                 | 606.4                    | 10.5                      |
| Kochi      | 779                            | 13                              | 0.698                                 | 1116.0                   | 18.6                      |
| Niigata    | 775                            | 5                               | 2.223                                 | 348.6                    | 2.2                       |
| Saga       | 766                            | 4                               | 0.815                                 | 939.9                    | 4.9                       |
| Aomori     | 644                            | 8                               | 1.246                                 | 516.9                    | 6.4                       |
| Kagawa     | 537                            | 5                               | 0.956                                 | 561.7                    | 5.2                       |
| Iwate      | 471                            | 25                              | 1.227                                 | 383.9                    | 20.4                      |
| Fukui      | 451                            | 12                              | 0.768                                 | 587.2                    | 15.6                      |
| Yamagata   | 443                            | 13                              | 1.078                                 | 410.9                    | 12.1                      |
| Tokushima  | 297                            | 9                               | 0.728                                 | 408.0                    | 12.4                      |
| Shimane    | 237                            | 0                               | 0.674                                 | 351.6                    | 0.0                       |
| Akita      | 216                            | 1                               | 0.966                                 | 223.6                    | 1.0                       |
| Tottori    | 178                            | 2                               | 0.556                                 | 320.1                    | 3.6                       |

**Table S1.** Cumulative number of cases and population in 47 prefectures in Japan.

\*1 As of 17 January 2021

\*2 As of 1 October 2019. Data were obtained from the website of Statistics Bureau, Ministry of Internal Affairs and Communications, Japan (<https://www.stat.go.jp/data/jinsui/2019np/index.html>)

| Country or region | Cases per million people | Tests per case |
|-------------------|--------------------------|----------------|
| Australia         | 1126.3                   | 431.9          |
| Japan             | 2614.8                   | 16.4           |
| Malaysia          | 4895.1                   | 25.2           |
| New Zealand       | 469.1                    | 647.2          |
| Philippines       | 4568.1                   | 13.8           |
| Singapore         | 10104.2                  | 102.5          |
| South Korea       | 1418.6                   | 67.4           |
| Taiwan            | 35.9                     | 160.8          |
| Thailand          | 178.0                    | 165.9          |

**Table S2.** Numbers of tests and cases in countries and region in Western Pacific Region.

Data as of 17 January 2021
